# Supplementary material for: Biological In Vitro Evaluation of PIL Graft Conjugates: Cytotoxicity Characteristics
Source: MDPI journal article supplement (doi:10.3390/ijms22147741), 2021-07-20
Supplement: s1 [file s1]

# Biological In Vitro Evaluation of PIL Graft Conjugates: Cytotoxicity Characteristics

Katarzyna Niesyto<sup>1</sup>, Wiktoria Łyżniak<sup>1</sup>, Magdalena Skonieczna<sup>2,3,\*</sup> and Dorota Neugebauer<sup>1,\*</sup>

<sup>1</sup> Department of Physical Chemistry and Technology of Polymers, Faculty of Chemistry, Silesian University of Technology, 44-100 Gliwice, Poland; katarzyna.niesyto@polsl.pl

<sup>2</sup> Department of Systems Biology and Engineering, Silesian University of Technology, Akademicka 16, 44-100 Gliwice, Poland

<sup>3</sup> Biotechnology Centre, Silesian University of Technology, Krzywoustego 8, 44-100 Gliwice, Poland

\* Correspondence: Magdalena.Skonieczna@polsl.pl (M.S.); Dorota.Neugebauer@polsl.pl (D.N.)

## Content:

**Figure S1.** Microscopic images by Live Cell Analyzer of untreated control cells vs treated (a) A549 and (b) BEAS-2B cells by polymer I and IV with  $\text{Cl}^-$ ,  $\text{PAS}^-$  and  $\text{CLV}^-$  counterions;

**Table S1.** Results of Annexin V apoptosis assay in A549 cells for control probe, PIL carriers varying with content of TMAMA units (25% and 50%) and grafting degree (26% and 46%), and their conjugates with PAS and CLV;

**Table S2.** Results of Annexin V apoptosis assay in BEAS-2B cells for control probe, PIL carriers varying with content of TMAMA units (25% and 50%) and grafting degree (26% and 46%), and their conjugates with PAS and CLV;

**Figure S2.** Plots of I and IV cell populations determined by flow cytometric analysis in (a) A549 and (b) BEAS-2B cell line;

**Table S3.** Results of cell cycle analysis in A549 cells for control probe, PIL carriers varying with content of TMAMA units (25% and 50%) and grafting degree (26% and 46%), and their conjugates with PAS and CLV;

**Table S4.** Results of cell cycle analysis in BEAS-2B cells for control probe, PIL carriers varying with content of TMAMA units (25% and 50%) and grafting degree (26% and 46%), and their conjugates with PAS and CLV.

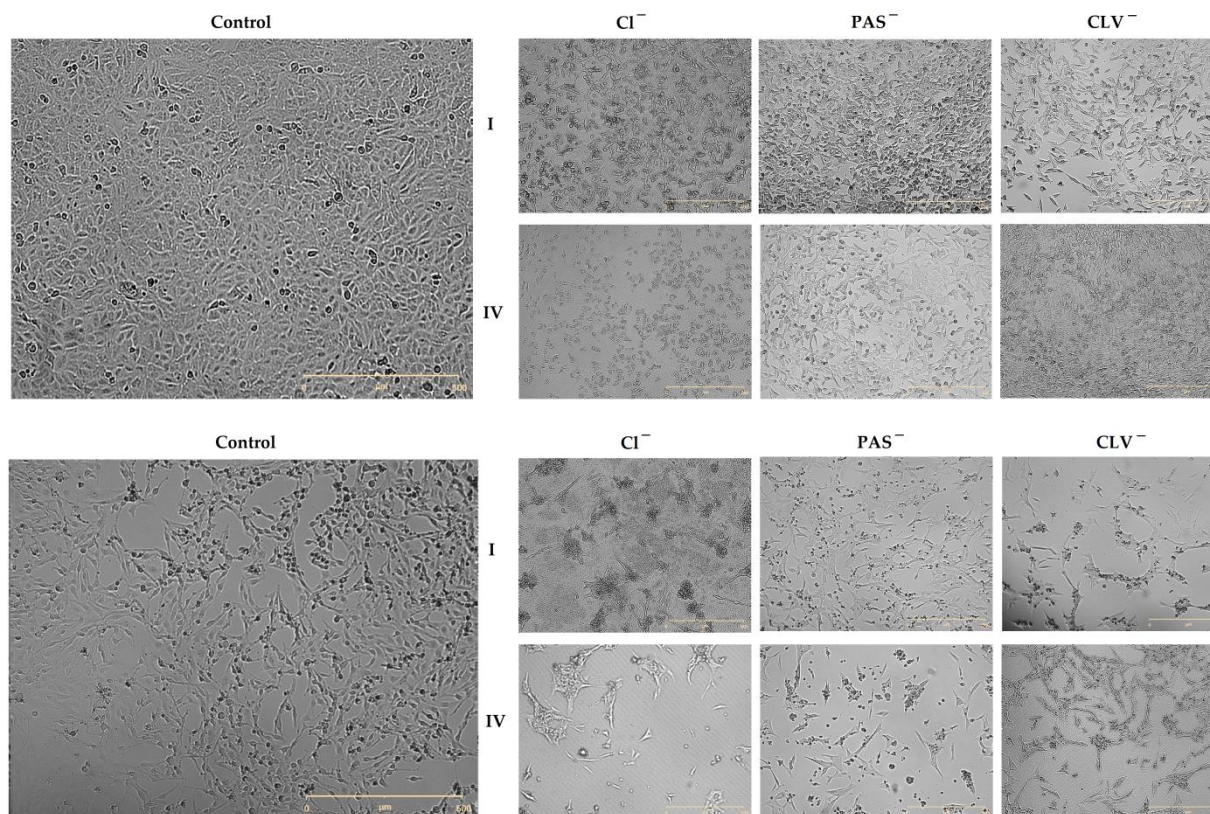

**Figure S1.** Microscopic images by Live Cell Analyzer of untreated control cells vs treated (a) A549 and (b) BEAS-2B cells by polymer I and IV with  $\text{Cl}^-$ ,  $\text{PAS}^-$  and  $\text{CLV}^-$  counterions

**Table S1.** Results of Annexin V apoptosis assay in A549 cells for control probe, PIL carriers varying with content of TMAMA units (25% and 50%) and grafting degree (26% and 46%), and their conjugates with PAS and CLV

|         | Carrier           |                   |                   |                   | Conjugates with:  |                   |                   |                   |                   |                   |                   |                   |
|---------|-------------------|-------------------|-------------------|-------------------|-------------------|-------------------|-------------------|-------------------|-------------------|-------------------|-------------------|-------------------|
|         |                   |                   |                   |                   | PAS               |                   |                   |                   | CLV               |                   |                   |                   |
|         | A-<br>/PI-<br>(%) | A+<br>/PI-<br>(%) | A-<br>/PI+<br>(%) | A+<br>/PI+<br>(%) | A-<br>/PI-<br>(%) | A+<br>/PI-<br>(%) | A-<br>/PI+<br>(%) | A+<br>/PI+<br>(%) | A-<br>/PI-<br>(%) | A+<br>/PI-<br>(%) | A-<br>/PI+<br>(%) | A+<br>/PI+<br>(%) |
| Control | 78.7              | 0                 | 21.3              | 0.04              | 78.7              | 0                 | 21.3              | 0.04              | 78.7              | 0                 | 21.3              | 0.04              |
| I       | 42.2              | 0.8               | 48.8              | 8.3               | 65.3              | 1.8               | 21.9              | 11.0              | 92.3              | 0                 | 7.6               | 0.03              |
| II      | 32.9              | 1.7               | 48.1              | 17.3              | 69.5              | 0                 | 30.5              | 0.03              | 82.9              | 0                 | 17.1              | 0.03              |
| III     | 32.4              | 1.9               | 53.0              | 12.7              | 82.0              | 0                 | 17.9              | 0.01              | 72.6              | 0                 | 27.4              | 0.01              |
| IV      | 75.2              | 0.3               | 19.8              | 4.7               | 76.0              | 1                 | 21.2              | 1.8               | 86.9              | 0                 | 13.0              | 0.05              |

**Table S2.** Results of Annexin V apoptosis assay in BEAS-2B cells for control probe, PIL carriers varying with TMAMA content (25% and 50%) and grafting degree (26% and 46%), and their conjugates with PAS and CLV

|         | Carrier           |                   |                   |                   | Conjugates with:  |                   |                   |                   |                   |                   |                   |                   |
|---------|-------------------|-------------------|-------------------|-------------------|-------------------|-------------------|-------------------|-------------------|-------------------|-------------------|-------------------|-------------------|
|         |                   |                   |                   |                   | PAS               |                   |                   |                   | CLV               |                   |                   |                   |
|         | A-<br>/PI-<br>(%) | A+<br>/PI-<br>(%) | A-<br>/PI+<br>(%) | A+<br>/PI+<br>(%) | A-<br>/PI-<br>(%) | A+<br>/PI-<br>(%) | A-<br>/PI+<br>(%) | A+<br>/PI+<br>(%) | A-<br>/PI-<br>(%) | A+<br>/PI-<br>(%) | A-<br>/PI+<br>(%) | A+<br>/PI+<br>(%) |
| Control | 97.5              | 0.1               | 2.2               | 0.2               | 97.5              | 0.1               | 2.2               | 0.2               | 97.5              | 0.1               | 2.2               | 2.2               |
| I       | 90.3              | 0.5               | 8.3               | 0.9               | 93.7              | 0.1               | 6.0               | 0.1               | 89.8              | 0.8               | 8.7               | 0.7               |
| II      | 85.5              | 0.7               | 13.2              | 0.6               | 90.5              | 0.7               | 9.6               | 0.3               | 89.0              | 1.0               | 9.3               | 0.8               |
| III     | 89.1              | 1.1               | 9.3               | 0.5               | 87.5              | 0.5               | 11.7              | 0.3               | 88.2              | 1.6               | 9.5               | 0.7               |
| IV      | 93.4              | 1.0               | 5.2               | 0.4               | 92.8              | 0.7               | 6.2               | 0.3               | 90.1              | 0.8               | 8.7               | 0.5               |

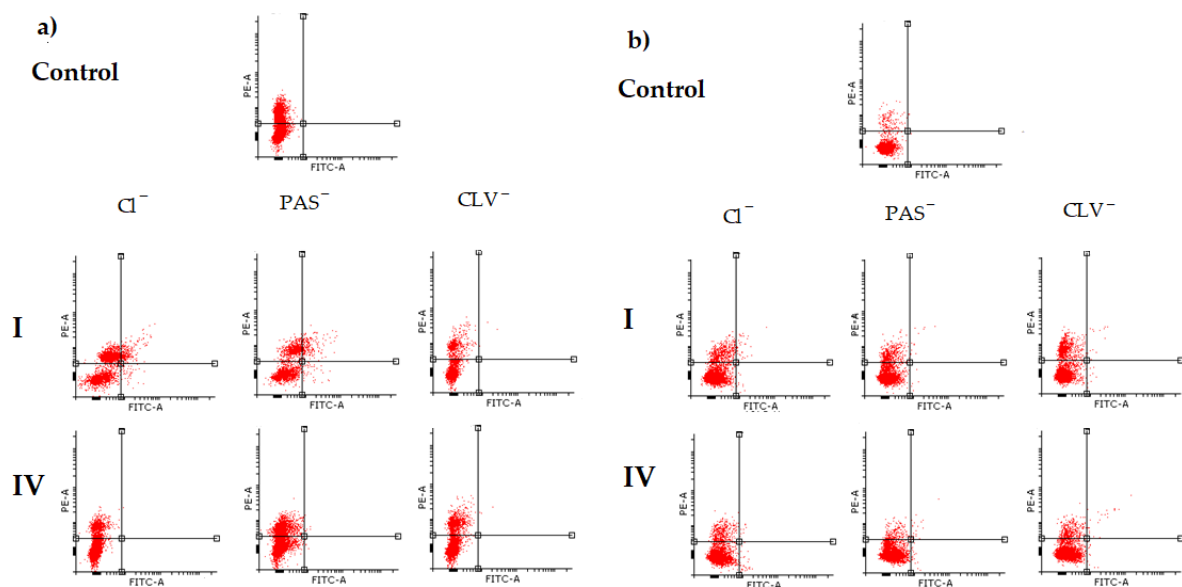

**Figure S2.** Plots of I and IV cell populations determined by flow cytometric analysis in (a) A549 and (b) BEAS-2B cell line.

**Table S3.** Results of cell cycle analysis in A549 cells for control probe, PIL carriers varying with content of TMAMA units (25% and 50%) and grafting degree (26% and 46%), and their conjugates with PAS and CLV.

|         | Carrier    |           |       |          | Conjugates with: |           |       |          |            |           |       |          |
|---------|------------|-----------|-------|----------|------------------|-----------|-------|----------|------------|-----------|-------|----------|
|         |            |           |       |          | PAS              |           |       |          | CLV        |           |       |          |
|         | Sub-G1 (%) | G0/G1 (%) | S (%) | G2/M (%) | Sub-G1 (%)       | G0/G1 (%) | S (%) | G2/M (%) | Sub-G1 (%) | G0/G1 (%) | S (%) | G2/M (%) |
| Control | 42.51      | 17.62     | 36.07 | 3.80     | 42.51            | 17.62     | 36.07 | 3.80     | 42.51      | 17.62     | 36.07 | 3.80     |
| I       | 0.75       | 69.56     | 16.78 | 12.61    | 65.3             | 70.36     | 19.40 | 7.35     | 37.06      | 7.77      | 52.06 | 3.13     |
| II      | 0.25       | 75.26     | 16.12 | 8.24     | 69.5             | 44.25     | 39.04 | 14.32    | 4.54       | 26.76     | 63.63 | 5.07     |
| III     | 0.41       | 66.76     | 23.86 | 8.96     | 82.0             | 43.35     | 44.89 | 6.34     | 17.23      | 18.35     | 60.29 | 4.13     |
| IV      | 2.82       | 68.40     | 18.95 | 9.82     | 76.0             | 68.40     | 18.95 | 9.82     | 2.95       | 43.04     | 48.75 | 5.24     |

**Table S4.** Results of cell cycle analysis in BEAS-2B cells for control probe, PIL carriers varying with content of TMAMA units (25% and 50%) and grafting degree (26% and 46%), and their conjugates with PAS and CLV.

|         | Carrier    |           |       |          | Conjugates with: |           |       |          |            |           |       |          |
|---------|------------|-----------|-------|----------|------------------|-----------|-------|----------|------------|-----------|-------|----------|
|         |            |           |       |          | PAS              |           |       |          | CLV        |           |       |          |
|         | Sub-G1 (%) | G0/G1 (%) | S (%) | G2/M (%) | Sub-G1 (%)       | G0/G1 (%) | S (%) | G2/M (%) | Sub-G1 (%) | G0/G1 (%) | S (%) | G2/M (%) |
| Control | 34.86      | 17.51     | 44.74 | 2.88     | 34.86            | 17.51     | 44.74 | 2.88     | 34.86      | 17.51     | 44.74 | 2.88     |
| I       | 1.95       | 6.80      | 75.98 | 15.27    | 3.59             | 12.51     | 73.14 | 10.77    | 0.66       | 6.58      | 80.12 | 12.65    |
| II      | 0.96       | 4.91      | 69.20 | 24.92    | 0.94             | 7.68      | 56.81 | 34.77    | 0.96       | 6.67      | 63.30 | 29.07    |
| III     | 1.18       | 12.51     | 63.47 | 22.93    | 1.44             | 8.76      | 77.29 | 12.51    | 1.22       | 7.87      | 65.98 | 24.93    |
| IV      | 2.12       | 13.52     | 75.78 | 8.57     | 1.92             | 15.48     | 75.13 | 7.47     | 3.92       | 16.06     | 71.56 | 8.46     |
